# Supplementary material for: Cellular Imaging and Time-Domain FLIM Studies of Meso-Tetraphenylporphine Disulfonate as a Photosensitising Agent in 2D and 3D Models
Source: MDPI journal article supplement (doi:10.3390/ijms25084222), 2024-04-11
Supplement: s1 [file s1]

## Supplementary

# Cellular Imaging and Time-Domain FLIM Studies of Meso-Tetraphenylporphine Disulfonate as a Photosensitising Agent in 2D and 3D Models

Andrea Balukova <sup>1</sup>, Kalliopi Bokea <sup>1</sup>, Paul R. Barber <sup>2,3</sup>, Simon M. Ameer-Beg <sup>3</sup>, Alexander J. MacRobert <sup>1,\*</sup> and Elnaz Yaghini <sup>1,\*</sup>

<sup>1</sup> Department of Surgical Biotechnology, Division of Surgery and Interventional Science, University College London, London NW3 2QG, UK; andrea.balukova.16@ucl.ac.uk (A.B.); kalliopi.bokea.19@ucl.ac.uk (K.B.)

<sup>2</sup> Department of Oncology, UCL Cancer Institute, University College London, London WC1E 6DD, UK; p.barber@ucl.ac.uk

<sup>3</sup> Comprehensive Cancer Centre, School of Cancer and Pharmaceutical Sciences, King's College London, London SE1 9RT, UK; simon.ameer-beg@kcl.ac.uk

\* Correspondence: a.macrobert@ucl.ac.uk (A.J.M.); elnaz.yaghini@ucl.ac.uk (E.Y.)

## Supporting Information

In the 3D compressed collagen model, constructs were cultivated for 1 week and then treated with 1  $\mu$ M TPPS<sub>2a</sub>, for 24 hours. Time-lapse confocal imaging was used to assess the changes in PS fluorescence intensity over time. An image was captured every minute for a duration of 5 minutes using a 405 nm laser for excitation at 100% intensity. For the time-lapse image analysis, MATLAB was used to generate a false colour intensity map. The TPPS<sub>2a</sub> fluorescence was notably dissipated after 3 min of light exposure, with further diminution evident after 5 minutes. (Figure S1).

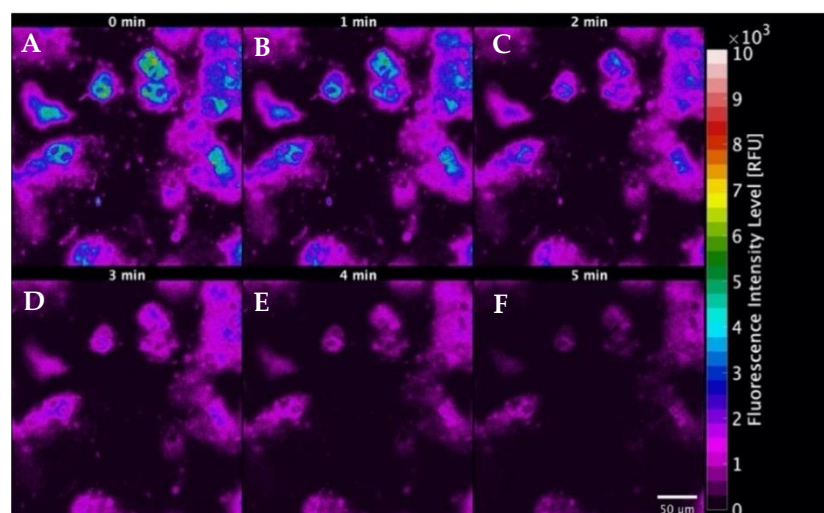

**Figure S1.** Confocal images of HEY 3D compressed spheroid construct. Constructs were treated with 1  $\mu$ M porphyrin TPPS<sub>2a</sub>, which was excited using the 405 nm laser. The montage presents a colour intensity map showing the decrease in TPPS<sub>2a</sub> fluorescence every 1 minute as laser exposure time increases. The scale bar presented in image F is 50  $\mu$ m and is representative for all images.

To show the spheroidal structure of the 3D compressed collagen constructs, z-stack images were obtained on 7-day grown constructs, which were fixed and stained with DAPI (Figure S2).

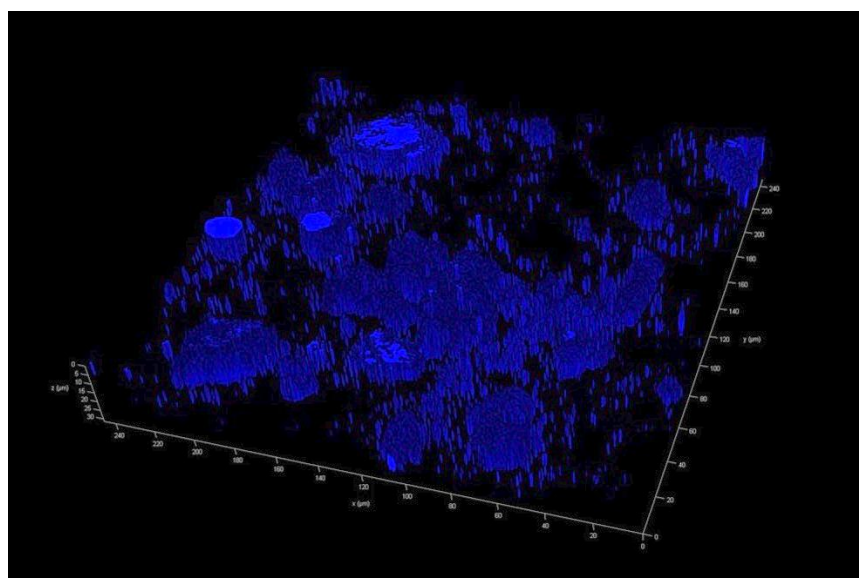

**Figure S2.** A z-stack 3D image of a 3D compressed collagen construct stained only with DAPI showing the spheroids. The x and y axis presented are 240 microns, and the z axis is 30 microns.

For the investigation of Dihydroethidium (DHE) as a detector of superoxide anion, both 2D and 3D models were co-treated with the porphyrin TPPS<sub>2a</sub> and DHE. For the 2D model, cells were incubated with 2  $\mu$ M TPPS<sub>2a</sub> for 22 hours after which the DHE was added for 2 hours at 10  $\mu$ M. In 2D model, an insignificant 15%  $\pm$  3% increase in DE fluorescence was detected in cells following 5 minutes light illumination in co-treated sample (Figure S3 A, B).

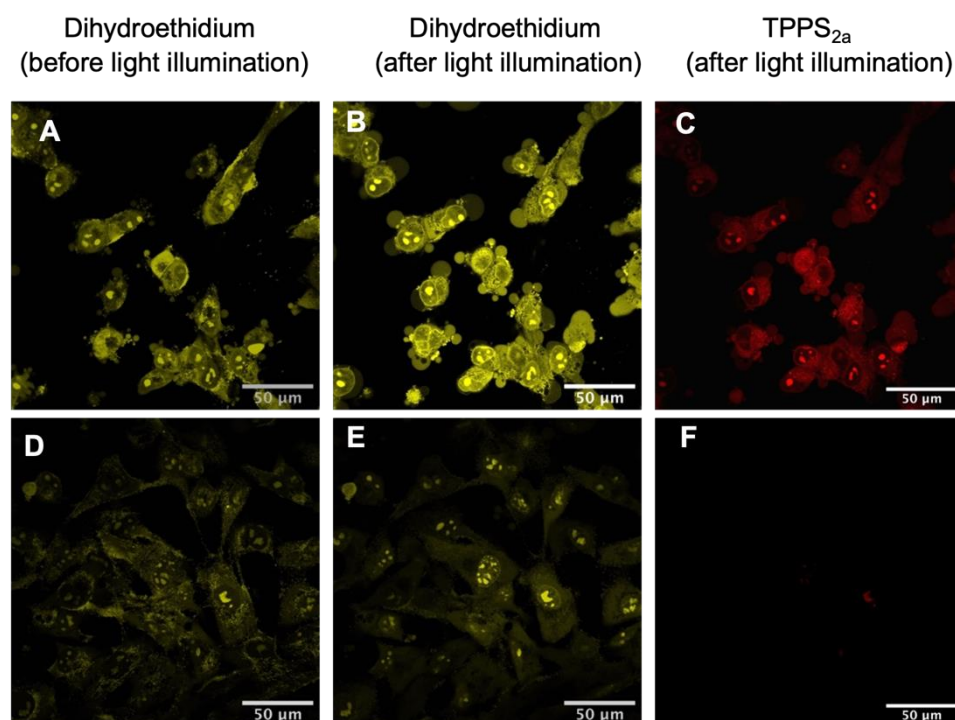

**Figure S3.** Confocal images of HEY 2D monolayer culture. (A, B, C): Cells were incubated with 2  $\mu$ M TPPS<sub>2a</sub> for 22 hours and 10  $\mu$ M DHE for a further 2 hours. (D, E, F): Cells were incubated only with 10  $\mu$ M DHE for 2 hours without TPPS<sub>2a</sub>. Illumination was carried out at 405 nm. The scale bar presented in each image is 50  $\mu$ m.
